# Supplementary material for: Physical Activity Is Associated with a Lower Risk of Osteoporotic Fractures in Osteoporosis: A Longitudinal Study
Source: MDPI journal article supplement (doi:10.3390/jpm12030491), 2022-03-18
Supplement: s1 [file s1]

**Table S1** Subgroup analyses of hazard ratio (95% confidence interval) for vertebral fx in the PA groups according to income, region of residence, obesity, smoking, alcohol consumption, total cholesterol, blood pressure, and fasting blood glucose

| Characteristics          | No. of vertebral fx/<br>No. of participants | Follow-up duration,<br>PY | Incidence rate,<br>per 100 PY | Hazard ratios for vertebral fx |         |                        |         | P for<br>interaction |
|--------------------------|---------------------------------------------|---------------------------|-------------------------------|--------------------------------|---------|------------------------|---------|----------------------|
|                          |                                             |                           |                               | Crude <sup>a</sup>             | P-value | Adjusted <sup>ab</sup> | P-value |                      |
| Income                   |                                             |                           |                               |                                |         |                        |         | 0.093                |
| Low income (n = 107,709) |                                             |                           |                               |                                |         |                        |         |                      |
| Low PA                   | 7,776/35,903 (21.7)                         | 66,844                    | 11.6                          | 1                              |         | 1                      |         |                      |
| Moderate PA              | 3,695/35,903 (10.3)                         | 79,642                    | 4.6                           | 0.42 (0.40-0.43)               | <0.001* | 0.42 (0.40-0.44)       | <0.001* |                      |
| High PA                  | 2,407/35,903 (6.7)                          | 83,755                    | 2.9                           | 0.26 (0.25-0.27)               | <0.001* | 0.27 (0.25-0.28)       | <0.001* |                      |
| High income (n = 68,151) |                                             |                           |                               |                                |         |                        |         |                      |
| Low PA                   | 5,011/22,717 (22.1)                         | 41,473                    | 12.1                          | 1                              |         | 1                      |         |                      |
| Moderate PA              | 2,538/22,717 (11.2)                         | 49,431                    | 5.1                           | 0.44 (0.42-0.46)               | <0.001* | 0.45 (0.42-0.47)       | <0.001* |                      |
| High PA                  | 1,635/22,717 (7.2)                          | 52,345                    | 3.1                           | 0.27 (0.26-0.29)               | <0.001* | 0.28 (0.26-0.29)       | <0.001* |                      |
| Region of residence      |                                             |                           |                               |                                |         |                        |         | <0.001*              |
| Urban (n = 76,569)       |                                             |                           |                               |                                |         |                        |         |                      |
| Low PA                   | 4,918/25,523 (19.3)                         | 47,734                    | 10.3                          | 1                              |         | 1                      |         |                      |
| Moderate PA              | 2,624/25,523 (10.3)                         | 54,891                    | 4.8                           | 0.48 (0.46-0.50)               | <0.001* | 0.48 (0.46-0.51)       | <0.001* |                      |
| High PA                  | 1,683/25,523 (6.6)                          | 58,032                    | 2.9                           | 0.30 (0.28-0.31)               | <0.001* | 0.30 (0.28-0.32)       | <0.001* |                      |

|                            |                     |        |      |                  |         |                  |         |       |
|----------------------------|---------------------|--------|------|------------------|---------|------------------|---------|-------|
| Rural (n = 99,291)         |                     |        |      |                  |         |                  |         |       |
| Low PA                     | 7,869/33,097 (23.8) | 60,583 | 13.0 | 1                |         | 1                |         |       |
| Moderate PA                | 3,609/33,097 (10.9) | 74,182 | 4.9  | 0.39 (0.38-0.41) | <0.001* | 0.40 (0.38-0.41) | <0.001* |       |
| High PA                    | 2,359/33,097 (7.1)  | 78,068 | 3.0  | 0.25 (0.24-0.26) | <0.001* | 0.25 (0.24-0.26) | <0.001* |       |
| Obesity                    |                     |        |      |                  |         |                  |         | 0.093 |
| Underweight (n = 5,981)    |                     |        |      |                  |         |                  |         |       |
| Low PA                     | 511/2,433 (21.0)    | 4,771  | 10.7 | 1                |         | 1                |         |       |
| Moderate PA                | 216/2,022 (10.7)    | 4,387  | 4.9  | 0.47 (0.40-0.56) | <0.001* | 0.48 (0.41-0.56) | <0.001* |       |
| High PA                    | 122/1,526 (8.0)     | 3,471  | 3.5  | 0.34 (0.28-0.42) | <0.001* | 0.37 (0.30-0.45) | <0.001* |       |
| Normal weight (n = 66,256) |                     |        |      |                  |         |                  |         |       |
| Low PA                     | 4,214/21,127 (20.0) | 39,945 | 10.5 | 1                |         | 1                |         |       |
| Moderate PA                | 2,180/22,246 (9.8)  | 48,140 | 4.5  | 0.44 (0.42-0.47) | <0.001* | 0.45 (0.43-0.47) | <0.001* |       |
| High PA                    | 1,385/22,883 (6.1)  | 51,859 | 2.7  | 0.27 (0.25-0.28) | <0.001* | 0.27 (0.26-0.29) | <0.001* |       |
| Overweight (n = 44,511)    |                     |        |      |                  |         |                  |         |       |
| Low PA                     | 3,083/13,857 (22.3) | 25,559 | 12.1 | 1                |         | 1                |         |       |
| Moderate PA                | 1,577/15,003 (10.5) | 33,184 | 4.8  | 0.41 (0.39-0.44) | <0.001* | 0.41 (0.39-0.44) | <0.001* |       |
| High PA                    | 1,087/15,651 (7.0)  | 36,558 | 3.0  | 0.26 (0.25-0.28) | <0.001* | 0.27 (0.25-0.29) | <0.001* |       |
| Obese (n = 59,112)         |                     |        |      |                  |         |                  |         |       |
| Low PA                     | 4,979/21,203 (23.5) | 38,042 | 13.1 | 1                |         | 1                |         |       |

|                                     |                      |         |      |                  |         |                  |         |
|-------------------------------------|----------------------|---------|------|------------------|---------|------------------|---------|
| Moderate PA                         | 2,260/19,349 (11.7)  | 43,362  | 5.2  | 0.42 (0.40-0.45) | <0.001* | 0.42 (0.40-0.44) | <0.001* |
| High PA                             | 1,448/18,560 (7.8)   | 44,212  | 3.3  | 0.27 (0.26-0.29) | <0.001* | 0.27 (0.25-0.29) | <0.001* |
| Smoking status                      |                      |         |      |                  |         |                  |         |
| Non-smoker (n = 158,863)            |                      |         |      |                  |         |                  |         |
| Low PA                              | 11,223/52,333 (21.5) | 96,350  | 11.6 | 1                |         | 1                |         |
| Moderate PA                         | 5,416/52,950 (10.2)  | 116,122 | 4.7  | 0.42 (0.41-0.43) | <0.001* | 0.42 (0.41-0.44) | <0.001* |
| High PA                             | 3,509/53,580 (6.6)   | 124,019 | 2.8  | 0.26 (0.25-0.27) | <0.001* | 0.26 (0.25-0.27) | <0.001* |
| Past or current smoker (n = 16,997) |                      |         |      |                  |         |                  |         |
| Low PA                              | 1,564/6,287 (24.9)   | 11,967  | 13.1 | 1                |         | 1                |         |
| Moderate PA                         | 817/5,670 (14.4)     | 12,951  | 6.3  | 0.51 (0.47-0.56) | <0.001* | 0.50 (0.46-0.54) | <0.001* |
| High PA                             | 533/5,040 (10.6)     | 12,081  | 4.4  | 0.36 (0.33-0.40) | <0.001* | 0.36 (0.32-0.39) | <0.001* |
| Alcohol consumption                 |                      |         |      |                  |         |                  |         |
| < 1 time a week (n = 153,492)       |                      |         |      |                  |         |                  |         |
| Low PA                              | 11,283/51,745 (21.8) | 95,563  | 11.8 | 1                |         | 1                |         |
| Moderate PA                         | 5,377/51,022 (10.5)  | 112,229 | 4.8  | 0.43 (0.41-0.44) | <0.001* | 0.43 (0.41-0.44) | <0.001* |
| High PA                             | 3,475/50,725 (6.9)   | 117,807 | 2.9  | 0.27 (0.26-0.28) | <0.001* | 0.27 (0.26-0.28) | <0.001* |
| ≥ 1 time a week (n = 22,368)        |                      |         |      |                  |         |                  |         |
| Low PA                              | 1,504/6,875 (21.9)   | 12,754  | 11.8 | 1                |         | 1                |         |

|                                               |                     |        |      |                  |         |                  |         |
|-----------------------------------------------|---------------------|--------|------|------------------|---------|------------------|---------|
| Moderate PA                                   | 856/7,598 (11.3)    | 16,844 | 5.1  | 0.45 (0.42-0.49) | <0.001* | 0.45 (0.41-0.49) | <0.001* |
| High PA                                       | 567/7,895 (7.2)     | 18,293 | 3.1  | 0.28 (0.25-0.31) | <0.001* | 0.28 (0.25-0.30) | <0.001* |
| Total cholesterol                             |                     |        |      |                  |         |                  |         |
| < 200 mg/dL (n = 95,839)                      |                     |        |      |                  |         |                  |         |
| Low PA                                        | 6,832/31,663 (21.6) | 57,127 | 12.0 | 1                |         | 1                |         |
| Moderate PA                                   | 3,376/31,943 (10.6) | 68,190 | 5.0  | 0.43 (0.42-0.45) | <0.001* | 0.44 (0.42-0.46) | <0.001* |
| High PA                                       | 2,257/32,233 (7.0)  | 72,665 | 3.1  | 0.28 (0.26-0.29) | <0.001* | 0.28 (0.27-0.30) | <0.001* |
| ≥ 200 to 240 < mg/dL (n = 55,466)             |                     |        |      |                  |         |                  |         |
| Low PA                                        | 3,983/18,269 (21.8) | 34,382 | 11.6 | 1                |         | 1                |         |
| Moderate PA                                   | 1,992/18,594 (10.7) | 42,069 | 4.7  | 0.43 (0.41-0.45) | <0.001* | 0.43 (0.41-0.45) | <0.001* |
| High PA                                       | 1,223/18,603 (6.6)  | 44,525 | 2.7  | 0.25 (0.24-0.27) | <0.001* | 0.26 (0.24-0.27) | <0.001* |
| ≥ 240 mg/dL (n = 24,555)                      |                     |        |      |                  |         |                  |         |
| Low PA                                        | 1,972/8,688 (22.7)  | 16,808 | 11.7 | 1                |         | 1                |         |
| Moderate PA                                   | 865/8,083 (10.7)    | 18,814 | 4.6  | 0.41 (0.38-0.45) | <0.001* | 0.41 (0.38-0.45) | <0.001* |
| High PA                                       | 562/7,784 (7.2)     | 18,910 | 3.0  | 0.27 (0.25-0.30) | <0.001* | 0.27 (0.25-0.30) | <0.001* |
| Blood pressure                                |                     |        |      |                  |         |                  |         |
| SBP <140 mmHg and DBP < 90 mmHg (n = 139,842) |                     |        |      |                  |         |                  |         |
| Low PA                                        | 9,678/45,582 (21.2) | 82,969 | 11.7 | 1                |         | 1                |         |

0.836

0.006\*

|                                                        |                     |         |      |                  |         |                  |         |
|--------------------------------------------------------|---------------------|---------|------|------------------|---------|------------------|---------|
| Moderate PA                                            | 4,733/46,931 (10.1) | 101,607 | 4.7  | 0.42 (0.40-0.43) | <0.001* | 0.42 (0.41-0.44) | <0.001* |
| High PA                                                | 3,048/47,329 (6.4)  | 108,674 | 2.8  | 0.26 (0.25-0.27) | <0.001* | 0.26 (0.25-0.27) | <0.001* |
| SBP $\geq$ 140 mmHg or DBP $\geq$ 90 mmHg (n = 36,018) |                     |         |      |                  |         |                  |         |
| Low PA                                                 | 3,109/13,038 (23.9) | 25,348  | 12.3 | 1                |         | 1                |         |
| Moderate PA                                            | 1,500/11,689 (12.8) | 27,466  | 5.5  | 0.47 (0.44-0.50) | <0.001* | 0.47 (0.44-0.50) | <0.001* |
| High PA                                                | 994/11,291 (8.8)    | 27,426  | 3.6  | 0.32 (0.29-0.34) | <0.001* | 0.32 (0.29-0.34) | <0.001* |
| Fasting blood glucose                                  |                     |         |      |                  |         |                  |         |
| < 100 mg/dL (n = 106,235)                              |                     |         |      |                  |         |                  |         |
| Low PA                                                 | 7,623/34,571 (22.1) | 64,143  | 11.9 | 1                |         | 1                |         |
| Moderate PA                                            | 3,793/35,946 (10.6) | 80,669  | 4.7  | 0.42 (0.40-0.43) | <0.001* | 0.42 (0.40-0.43) | <0.001* |
| High PA                                                | 2,419/35,718 (6.8)  | 84,068  | 2.9  | 0.26 (0.25-0.27) | <0.001* | 0.26 (0.25-0.27) | <0.001* |
| $\geq$ 100 mg/dL (n = 69,625)                          |                     |         |      |                  |         |                  |         |
| Low PA                                                 | 5,164/24,049 (21.5) | 44,174  | 11.7 | 1                |         | 1                |         |
| Moderate PA                                            | 2,440/22,674 (10.8) | 48,404  | 5.0  | 0.45 (0.43-0.47) | <0.001* | 0.46 (0.43-0.48) | <0.001* |
| High PA                                                | 1,623/22,902 (7.1)  | 52,032  | 3.1  | 0.29 (0.27-0.30) | <0.001* | 0.29 (0.27-0.31) | <0.001* |

0.140

Abbreviations: CCI, Charlson comorbidity index; DBP, diastolic blood pressure; fx, fx; PA, physical activity; PY, person-year; SBP, systolic blood pressure

\* Cox proportional hazard model, Significance at  $P < 0.05$  with Bonferroni correction

<sup>a</sup> Stratified by age, gender, income, and region of residence in subgroup analyses according to income and region of residence

<sup>b</sup> In subgroup analyses according to income and region of residence, the model was adjusted for total cholesterol, SBP, DBP, fasting blood glucose, obesity, smoking, alcohol consumption, and CCI score; in other subgroup analyses, the model was adjusted for above variable plus age, gender, income, and region of residence.
