# Supplementary material for: Physical Activity Is Associated with a Lower Risk of Osteoporotic Fractures in Osteoporosis: A Longitudinal Study
Source: MDPI journal article supplement (doi:10.3390/jpm12030491), 2022-03-18
Supplement: s1 [file s1]

**Table S4** Subgroup analyses of hazard ratios (95% confidence intervals) for each osteoporotic fracture in the PA groups according to previous PA level

| Characteristics                             | No. of fx/<br>No. of participants | Hazard ratios for each fx |         |                       |         |
|---------------------------------------------|-----------------------------------|---------------------------|---------|-----------------------|---------|
|                                             |                                   | Crude                     | P-value | Adjusted <sup>a</sup> | P-value |
| Hazard ratios for vertebral fx              |                                   |                           |         |                       |         |
| Low PA previously (n = 60,995)              |                                   |                           |         |                       |         |
| Low PA                                      | 5,231/25,477 (20.5)               | 1                         |         | 1                     |         |
| Moderate PA                                 | 1,872/20,304 (9.2)                | 0.37 (0.35-0.39)          | <0.001* | 0.37 (0.35-0.39)      | <0.001* |
| High PA                                     | 952/15,214 (6.3)                  | 0.24 (0.22-0.26)          | <0.001* | 0.24 (0.23-0.26)      | <0.001* |
| Moderate PA previously (n = 45,618)         |                                   |                           |         |                       |         |
| Low PA                                      | 2,218/10,942 (20.3)               | 1                         |         | 1                     |         |
| Moderate PA                                 | 1,479/16,420 (9.0)                | 0.40 (0.37-0.43)          | <0.001* | 0.40 (0.38-0.43)      | <0.001* |
| High PA                                     | 1,005/18,256 (5.5)                | 0.23 (0.21-0.24)          | <0.001* | 0.23 (0.22-0.25)      | <0.001* |
| High PA previously (n = 10,488)             |                                   |                           |         |                       |         |
| Low PA                                      | 302/1,426 (21.2)                  | 1                         |         | 1                     |         |
| Moderate PA                                 | 242/2,607 (9.3)                   | 0.44 (0.37-0.52)          | <0.001* | 0.45 (0.38-0.54)      | <0.001* |
| High PA                                     | 367/6,455 (5.7)                   | 0.25 (0.21-0.29)          | <0.001* | 0.27 (0.23-0.31)      | <0.001* |
| Non-information of previous PA (n = 58,759) |                                   |                           |         |                       |         |
| Low PA                                      | 5,036/20,775 (24.2)               | 1                         |         | 1                     |         |
| Moderate PA                                 | 2,640/19,289 (13.7)               | 0.50 (0.48-0.53)          | <0.001* | 0.50 (0.48-0.52)      | <0.001* |
| High PA                                     | 1,718/18,695 (9.2)                | 0.33 (0.31-0.35)          | <0.001* | 0.33 (0.31-0.34)      | <0.001* |
| Hazard ratios for hip fx                    |                                   |                           |         |                       |         |
| Low PA previously (n = 60,995)              |                                   |                           |         |                       |         |
| Low PA                                      | 761/25,477 (3.0)                  | 1                         |         | 1                     |         |
| Moderate PA                                 | 236/20,304 (1.2)                  | 0.36 (0.31-0.42)          | <0.001* | 0.39 (0.34-0.46)      | <0.001* |
| High PA                                     | 156/15,214 (1.0)                  | 0.31 (0.26-0.37)          | <0.001* | 0.36 (0.30-0.43)      | <0.001* |
| Moderate PA previously (n = 45,618)         |                                   |                           |         |                       |         |
| Low PA                                      | 321/10,942 (2.9)                  | 1                         |         | 1                     |         |

|                                             |                     |                  |         |                  |         |
|---------------------------------------------|---------------------|------------------|---------|------------------|---------|
| Moderate PA                                 | 238/16,420 (1.5)    | 0.50 (0.42-0.59) | <0.001* | 0.54 (0.46-0.64) | <0.001* |
| High PA                                     | 165/18,256 (0.9)    | 0.30 (0.25-0.36) | <0.001* | 0.35 (0.29-0.42) | <0.001* |
| High PA previously (n = 10,488)             |                     |                  |         |                  |         |
| Low PA                                      | 49/1,426 (3.4)      | 1                |         | 1                |         |
| Moderate PA                                 | 40/2,607 (1.5)      | 0.50 (0.33-0.75) | 0.001   | 0.54 (0.35-0.82) | 0.004   |
| High PA                                     | 61/6,455 (1.0)      | 0.29 (0.20-0.43) | <0.001* | 0.35 (0.24-0.51) | <0.001* |
| Non-information of previous PA (n = 58,759) |                     |                  |         |                  |         |
| Low PA                                      | 917/20,775 (4.4)    | 1                |         | 1                |         |
| Moderate PA                                 | 470/19,289 (2.4)    | 0.54 (0.48-0.60) | <0.001* | 0.57 (0.51-0.64) | <0.001* |
| High PA                                     | 305/18,695 (1.6)    | 0.36 (0.32-0.41) | <0.001* | 0.39 (0.34-0.45) | <0.001* |
| Hazard ratios for distal radius fx          |                     |                  |         |                  |         |
| Low PA previously (n = 60,995)              |                     |                  |         |                  |         |
| Low PA                                      | 3,334/25,477 (13.1) | 1                |         | 1                |         |
| Moderate PA                                 | 1,260/20,304 (6.2)  | 0.42 (0.39-0.44) | <0.001* | 0.39 (0.37-0.42) | <0.001* |
| High PA                                     | 659/15,214 (4.3)    | 0.28 (0.26-0.31) | <0.001* | 0.26 (0.24-0.28) | <0.001* |
| Moderate PA previously (n = 45,618)         |                     |                  |         |                  |         |
| Low PA                                      | 1,535/10,942 (14.0) | 1                |         | 1                |         |
| Moderate PA                                 | 1,063/16,420 (6.5)  | 0.44 (0.40-0.47) | <0.001* | 0.41 (0.38-0.44) | <0.001* |
| High PA                                     | 876/18,256 (4.8)    | 0.31 (0.28-0.33) | <0.001* | 0.28 (0.25-0.30) | <0.001* |
| High PA previously (n = 10,488)             |                     |                  |         |                  |         |
| Low PA                                      | 190/1,426 (13.3)    | 1                |         | 1                |         |
| Moderate PA                                 | 194/2,607 (7.4)     | 0.58 (0.48-0.71) | <0.001* | 0.55 (0.45-0.67) | <0.001* |
| High PA                                     | 321/6,455 (5.0)     | 0.37 (0.31-0.44) | <0.001* | 0.33 (0.28-0.40) | <0.001* |
| Non-information of previous PA (n = 58,759) |                     |                  |         |                  |         |
| Low PA                                      | 3,060/20,775 (14.7) | 1                |         | 1                |         |
| Moderate PA                                 | 1,712/19,289 (8.9)  | 0.57 (0.54-0.61) | <0.001* | 0.56 (0.52-0.59) | <0.001* |
| High PA                                     | 1,135/18,695 (6.1)  | 0.39 (0.36-0.41) | <0.001* | 0.37 (0.35-0.40) | <0.001* |

Abbreviations: CCI, Charlson comorbidity index; DBP, diastolic blood pressure; fx, fracture; SBP, systolic blood pressure

\* Cox proportional hazard model, Significance at  $P < 0.05$  with Bonferroni correction

<sup>a</sup> The model was adjusted for age, gender, income, region of residence, total cholesterol, SBP, DBP, fasting blood glucose, obesity, smoking, alcohol consumption, and CCI score
