# Supplementary material for: Physical Activity Is Associated with a Lower Risk of Osteoporotic Fractures in Osteoporosis: A Longitudinal Study
Source: MDPI journal article supplement (doi:10.3390/jpm12030491), 2022-03-18
Supplement: s1 [file s1]

**Table S3** Subgroup analyses of hazard ratio (95% confidence interval) for distal radius fx in the PA groups according to income, region of residence, obesity, smoking, alcohol consumption, total cholesterol, blood pressure, and fasting blood glucose

| Characteristics          | No. of distal radius fx/ | Follow-up duration,<br>PY | Incidence rate,<br>per 100 PY | Hazard ratios for distal radius fx |                    |                  |                        | P for<br>interaction |         |
|--------------------------|--------------------------|---------------------------|-------------------------------|------------------------------------|--------------------|------------------|------------------------|----------------------|---------|
|                          | No. of participants      |                           |                               |                                    | Crude <sup>a</sup> | P-value          | Adjusted <sup>ab</sup> |                      | P-value |
| Income                   |                          |                           |                               |                                    |                    |                  |                        |                      | 0.008*  |
| Low income (n = 107,709) |                          |                           |                               |                                    |                    |                  |                        |                      |         |
| Low PA                   | 5,248/35,903 (14.6)      | 72,607                    | 7.2                           | 1                                  |                    | 1                |                        |                      |         |
| Moderate PA              | 2,685/35,903 (7.5)       | 81,331                    | 3.3                           | 0.47 (0.44-0.49)                   | <0.001*            | 0.45 (0.43-0.47) | <0.001*                |                      |         |
| High PA                  | 1,881/35,903 (5.2)       | 84,593                    | 2.2                           | 0.32 (0.30-0.33)                   | <0.001*            | 0.30 (0.29-0.32) | <0.001*                |                      |         |
| High income (n = 68,151) |                          |                           |                               |                                    |                    |                  |                        |                      |         |
| Low PA                   | 2,871/22,717 (12.6)      | 47,026                    | 6.1                           | 1                                  |                    | 1                |                        |                      |         |
| Moderate PA              | 1,544/22,717 (6.8)       | 51,473                    | 3.0                           | 0.50 (0.47-0.53)                   | <0.001*            | 0.49 (0.46-0.52) | <0.001*                |                      |         |
| High PA                  | 1,110/22,717 (4.9)       | 53,330                    | 2.1                           | 0.35 (0.33-0.38)                   | <0.001*            | 0.34 (0.32-0.36) | <0.001*                |                      |         |
| Region of residence      |                          |                           |                               |                                    |                    |                  |                        |                      | <0.001* |
| Urban (n = 76,569)       |                          |                           |                               |                                    |                    |                  |                        |                      |         |
| Low PA                   | 3,409/25,523 (13.4)      | 50,972                    | 6.7                           | 1                                  |                    | 1                |                        |                      |         |
| Moderate PA              | 1,929/25,523 (7.6)       | 56,060                    | 3.4                           | 0.53 (0.50-0.56)                   | <0.001*            | 0.51 (0.48-0.54) | <0.001*                |                      |         |
| High PA                  | 1,334/25,523 (5.2)       | 58,550                    | 2.3                           | 0.35 (0.33-0.38)                   | <0.001*            | 0.34 (0.32-0.36) | <0.001*                |                      |         |

|                            |                     |        |     |                  |         |                  |         |       |
|----------------------------|---------------------|--------|-----|------------------|---------|------------------|---------|-------|
| Rural (n = 99,291)         |                     |        |     |                  |         |                  |         |       |
| Low PA                     | 4,710/33,097 (14.2) | 68,661 | 6.9 | 1                |         | 1                |         |       |
| Moderate PA                | 2,300/33,097 (7.0)  | 76,744 | 3.0 | 0.44 (0.42-0.47) | <0.001* | 0.43 (0.41-0.45) | <0.001* |       |
| High PA                    | 1,657/33,097 (5.0)  | 79,373 | 2.1 | 0.31 (0.30-0.33) | <0.001* | 0.30 (0.28-0.32) | <0.001* |       |
| Obesity                    |                     |        |     |                  |         |                  |         | 0.370 |
| Underweight (n = 5,981)    |                     |        |     |                  |         |                  |         |       |
| Low PA                     | 254/2,433 (10.4)    | 5,410  | 4.7 | 1                |         | 1                |         |       |
| Moderate PA                | 131/2,022 (6.5)     | 4,588  | 2.9 | 0.61 (0.50-0.76) | <0.001* | 0.59 (0.48-0.73) | <0.001* |       |
| High PA                    | 75/1,526 (4.9)      | 3,588  | 2.1 | 0.46 (0.35-0.59) | <0.001* | 0.42 (0.32-0.54) | <0.001* |       |
| Normal weight (n = 66,256) |                     |        |     |                  |         |                  |         |       |
| Low PA                     | 3,126/21,127 (14.8) | 42,370 | 7.4 | 1                |         | 1                |         |       |
| Moderate PA                | 1,653/22,246 (7.4)  | 48,937 | 3.4 | 0.47 (0.45-0.50) | <0.001* | 0.45 (0.42-0.48) | <0.001* |       |
| High PA                    | 1,232/22,883 (5.4)  | 51,965 | 2.4 | 0.34 (0.31-0.36) | <0.001* | 0.31 (0.29-0.33) | <0.001* |       |
| Overweight (n = 44,511)    |                     |        |     |                  |         |                  |         |       |
| Low PA                     | 2,029/13,857 (14.6) | 28,033 | 7.2 | 1                |         | 1                |         |       |
| Moderate PA                | 1,143/15,003 (7.6)  | 33,895 | 3.4 | 0.48 (0.45-0.52) | <0.001* | 0.47 (0.43-0.50) | <0.001* |       |
| High PA                    | 775/15,651 (5.0)    | 37,061 | 2.1 | 0.31 (0.28-0.33) | <0.001* | 0.29 (0.27-0.32) | <0.001* |       |
| Obese (n = 59,112)         |                     |        |     |                  |         |                  |         |       |
| Low PA                     | 2,710/21,203 (12.8) | 43,820 | 6.2 | 1                |         | 1                |         |       |

|                                     |                     |         |     |                  |         |                  |         |
|-------------------------------------|---------------------|---------|-----|------------------|---------|------------------|---------|
| Moderate PA                         | 1,302/19,349 (6.7)  | 45,384  | 2.9 | 0.49 (0.45-0.52) | <0.001* | 0.48 (0.44-0.51) | <0.001* |
| High PA                             | 909/18,560 (4.9)    | 45,309  | 2.0 | 0.35 (0.32-0.37) | <0.001* | 0.34 (0.32-0.37) | <0.001* |
| Smoking status                      |                     |         |     |                  |         |                  | <0.001* |
| Non-smoker (n = 158,863)            |                     |         |     |                  |         |                  |         |
| Low PA                              | 7,594/52,333 (14.5) | 104,838 | 7.2 | 1                |         | 1                |         |
| Moderate PA                         | 3,919/52,950 (7.4)  | 118,587 | 3.3 | 0.47 (0.46-0.49) | <0.001* | 0.45 (0.44-0.47) | <0.001* |
| High PA                             | 2,772/53,580 (5.2)  | 125,225 | 2.2 | 0.32 (0.31-0.34) | <0.001* | 0.31 (0.29-0.32) | <0.001* |
| Past or current smoker (n = 16,997) |                     |         |     |                  |         |                  |         |
| Low PA                              | 525/6,287 (8.4)     | 14,795  | 3.5 | 1                |         | 1                |         |
| Moderate PA                         | 310/5,670 (5.5)     | 14,217  | 2.2 | 0.63 (0.55-0.73) | <0.001* | 0.64 (0.56-0.74) | <0.001* |
| High PA                             | 219/5,040 (4.4)     | 12,698  | 1.7 | 0.50 (0.43-0.59) | <0.001* | 0.51 (0.44-0.60) | <0.001* |
| Alcohol consumption                 |                     |         |     |                  |         |                  | 0.381   |
| < 1 time a week (n = 153,492)       |                     |         |     |                  |         |                  |         |
| Low PA                              | 7,102/51,745 (13.7) | 105,607 | 6.7 | 1                |         | 1                |         |
| Moderate PA                         | 3,584/51,022 (7.0)  | 115,564 | 3.1 | 0.48 (0.46-0.50) | <0.001* | 0.46 (0.44-0.48) | <0.001* |
| High PA                             | 2,558/50,725 (5.0)  | 119,400 | 2.1 | 0.34 (0.32-0.35) | <0.001* | 0.32 (0.30-0.33) | <0.001* |
| ≥ 1 time a week (n = 22,368)        |                     |         |     |                  |         |                  |         |
| Low PA                              | 1,017/6,875 (14.8)  | 14,026  | 7.3 | 1                |         | 1                |         |

|                                               |                     |        |     |                  |         |                  |         |
|-----------------------------------------------|---------------------|--------|-----|------------------|---------|------------------|---------|
| Moderate PA                                   | 645/7,598 (8.5)     | 17,240 | 3.7 | 0.54 (0.49-0.59) | <0.001* | 0.52 (0.47-0.57) | <0.001* |
| High PA                                       | 433/7,895 (5.5)     | 18,523 | 2.3 | 0.34 (0.30-0.38) | <0.001* | 0.33 (0.29-0.37) | <0.001* |
| Total cholesterol                             |                     |        |     |                  |         |                  |         |
| < 200 mg/dL (n = 95,839)                      |                     |        |     |                  |         |                  |         |
| Low PA                                        | 4,076/31,663 (12.9) | 63,693 | 6.4 | 1                |         | 1                |         |
| Moderate PA                                   | 2,120/31,943 (6.6)  | 70,818 | 3.0 | 0.48 (0.46-0.51) | <0.001* | 0.46 (0.43-0.48) | <0.001* |
| High PA                                       | 1,527/32,233 (4.7)  | 74,060 | 2.1 | 0.34 (0.32-0.36) | <0.001* | 0.31 (0.30-0.33) | <0.001* |
| ≥ 200 to 240 < mg/dL (n = 55,466)             |                     |        |     |                  |         |                  |         |
| Low PA                                        | 2,706/18,269 (14.8) | 37,482 | 7.2 | 1                |         | 1                |         |
| Moderate PA                                   | 1,448/18,594 (7.8)  | 42,820 | 3.4 | 0.49 (0.46-0.52) | <0.001* | 0.47 (0.44-0.50) | <0.001* |
| High PA                                       | 1,039/18,603 (5.6)  | 44,775 | 2.3 | 0.34 (0.32-0.37) | <0.001* | 0.32 (0.30-0.35) | <0.001* |
| ≥ 240 mg/dL (n = 24,555)                      |                     |        |     |                  |         |                  |         |
| Low PA                                        | 1,337/8,688 (15.4)  | 18,458 | 7.2 | 1                |         | 1                |         |
| Moderate PA                                   | 661/8,083 (8.2)     | 19,166 | 3.4 | 0.49 (0.45-0.54) | <0.001* | 0.48 (0.43-0.52) | <0.001* |
| High PA                                       | 425/7,784 (5.5)     | 19,088 | 2.2 | 0.32 (0.29-0.36) | <0.001* | 0.31 (0.27-0.34) | <0.001* |
| Blood pressure                                |                     |        |     |                  |         |                  |         |
| SBP <140 mmHg and DBP < 90 mmHg (n = 139,842) |                     |        |     |                  |         |                  |         |
| Low PA                                        | 6,525/45,582 (14.3) | 90,221 | 7.2 | 1                |         | 1                |         |

0.578

0.052

|                                                        |                     |         |     |                  |         |                  |         |
|--------------------------------------------------------|---------------------|---------|-----|------------------|---------|------------------|---------|
| Moderate PA                                            | 3,426/46,931 (7.3)  | 103,673 | 3.3 | 0.47 (0.46-0.49) | <0.001* | 0.45 (0.44-0.47) | <0.001* |
| High PA                                                | 2,432/47,329 (5.1)  | 109,727 | 2.2 | 0.33 (0.31-0.34) | <0.001* | 0.31 (0.29-0.32) | <0.001* |
| SBP $\geq$ 140 mmHg or DBP $\geq$ 90 mmHg (n = 36,018) |                     |         |     |                  |         |                  |         |
| Low PA                                                 | 1,594/13,038 (12.2) | 29,412  | 5.4 | 1                |         | 1                |         |
| Moderate PA                                            | 803/11,689 (6.9)    | 29,131  | 2.8 | 0.53 (0.48-0.57) | <0.001* | 0.52 (0.47-0.56) | <0.001* |
| High PA                                                | 559/11,291 (5.0)    | 28,196  | 2.0 | 0.38 (0.35-0.42) | <0.001* | 0.37 (0.34-0.41) | <0.001* |
| Fasting blood glucose                                  |                     |         |     |                  |         |                  | 0.333   |
| < 100 mg/dL (n = 106,235)                              |                     |         |     |                  |         |                  |         |
| Low PA                                                 | 5,122/34,571 (14.8) | 69,997  | 7.3 | 1                |         | 1                |         |
| Moderate PA                                            | 2,678/35,946 (7.5)  | 82,556  | 3.2 | 0.46 (0.44-0.49) | <0.001* | 0.44 (0.42-0.47) | <0.001* |
| High PA                                                | 1,905/35,718 (5.3)  | 85,063  | 2.2 | 0.32 (0.31-0.34) | <0.001* | 0.30 (0.29-0.32) | <0.001* |
| $\geq$ 100 mg/dL (n = 69,625)                          |                     |         |     |                  |         |                  |         |
| Low PA                                                 | 2,997/24,049 (12.5) | 49,636  | 6.0 | 1                |         | 1                |         |
| Moderate PA                                            | 1,551/22,674 (6.8)  | 50,248  | 3.1 | 0.52 (0.49-0.56) | <0.001* | 0.50 (0.47-0.54) | <0.001* |
| High PA                                                | 1,086/22,902 (4.7)  | 52,860  | 2.1 | 0.36 (0.33-0.38) | <0.001* | 0.34 (0.32-0.36) | <0.001* |

Abbreviations: CCI, Charlson comorbidity index; DBP, diastolic blood pressure; fx, fracture; PA, physical activity; PY, person-year; SBP, systolic blood pressure

\* Cox proportional hazard model, Significance at  $P < 0.05$  with Bonferroni correction

<sup>a</sup> Stratified by age, gender, income, and region of residence in subgroup analyses according to income and region of residence

<sup>b</sup> In subgroup analyses according to income and region of residence, the model was adjusted for total cholesterol, SBP, DBP, fasting blood glucose, obesity, smoking, alcohol consumption, and CCI score; in other subgroup analyses, the model was adjusted for above variable plus age, gender, income, and region of residence.
