# Supplementary material for: Physical Activity Is Associated with a Lower Risk of Osteoporotic Fractures in Osteoporosis: A Longitudinal Study
Source: MDPI journal article supplement (doi:10.3390/jpm12030491), 2022-03-18
Supplement: s1 [file s1]

**Table S2** Subgroup analyses of hazard ratio (95% confidence interval) for hip fx in the PA groups according to income, region of residence, obesity, smoking, alcohol consumption, total cholesterol, blood pressure, and fasting blood glucose

| Characteristics          | No. of hip fx/<br>No. of participants | Follow-up duration,<br>PY | Incidence rate,<br>per 100 PY | Hazard ratios for hip fx |         |                        |         | P for<br>interaction |       |
|--------------------------|---------------------------------------|---------------------------|-------------------------------|--------------------------|---------|------------------------|---------|----------------------|-------|
|                          |                                       |                           |                               | Crude <sup>a</sup>       | P-value | Adjusted <sup>ab</sup> | P-value |                      |       |
| Income                   |                                       |                           |                               |                          |         |                        |         |                      | 0.776 |
| Low income (n = 107,709) |                                       |                           |                               |                          |         |                        |         |                      |       |
| Low PA                   | 1,176/35,903 (3.3)                    | 86,111                    | 1.4                           | 1                        |         | 1                      |         |                      |       |
| Moderate PA              | 567/35,903 (1.6)                      | 87,770                    | 0.6                           | 0.47 (0.43-0.52)         | <0.001* | 0.51 (0.46-0.56)       | <0.001* |                      |       |
| High PA                  | 388/35,903 (1.1)                      | 88,366                    | 0.4                           | 0.32 (0.29-0.36)         | <0.001* | 0.36 (0.32-0.40)       | <0.001* |                      |       |
| High income (n = 68,151) |                                       |                           |                               |                          |         |                        |         |                      |       |
| Low PA                   | 872/22,717 (3.8)                      | 53,708                    | 1.6                           | 1                        |         | 1                      |         |                      |       |
| Moderate PA              | 417/22,717 (1.8)                      | 54,980                    | 0.8                           | 0.47 (0.42-0.52)         | <0.001* | 0.50 (0.45-0.57)       | <0.001* |                      |       |
| High PA                  | 299/22,717 (1.3)                      | 55,341                    | 0.5                           | 0.33 (0.29-0.38)         | <0.001* | 0.37 (0.33-0.43)       | <0.001* |                      |       |
| Region of residence      |                                       |                           |                               |                          |         |                        |         |                      | 0.596 |
| Urban (n = 76,569)       |                                       |                           |                               |                          |         |                        |         |                      |       |
| Low PA                   | 922/25,523 (3.6)                      | 59,395                    | 1.6                           | 1                        |         | 1                      |         |                      |       |
| Moderate PA              | 446/25,523 (1.8)                      | 60,667                    | 0.7                           | 0.47 (0.42-0.53)         | <0.001* | 0.50 (0.45-0.56)       | <0.001* |                      |       |
| High PA                  | 323/25,523 (1.3)                      | 61,130                    | 0.5                           | 0.34 (0.30-0.39)         | <0.001* | 0.37 (0.33-0.42)       | <0.001* |                      |       |

|                            |                    |        |     |                  |         |                  |         |       |
|----------------------------|--------------------|--------|-----|------------------|---------|------------------|---------|-------|
| Rural (n = 99,291)         |                    |        |     |                  |         |                  |         |       |
| Low PA                     | 1,126/33,097 (3.4) | 80,424 | 1.4 | 1                |         | 1                |         |       |
| Moderate PA                | 538/33,097 (1.6)   | 82,083 | 0.7 | 0.47 (0.42-0.52) | <0.001* | 0.51 (0.46-0.56) | <0.001* |       |
| High PA                    | 364/33,097 (1.1)   | 82,577 | 0.4 | 0.32 (0.28-0.36) | <0.001* | 0.36 (0.32-0.41) | <0.001* |       |
| Obesity                    |                    |        |     |                  |         |                  |         | 0.272 |
| Underweight (n = 5,981)    |                    |        |     |                  |         |                  |         |       |
| Low PA                     | 163/2,433 (6.7)    | 5,780  | 2.8 | 1                |         | 1                |         |       |
| Moderate PA                | 74/2,022 (3.7)     | 4,761  | 1.6 | 0.55 (0.42-0.73) | <0.001* | 0.60 (0.45-0.79) | <0.001* |       |
| High PA                    | 36/1,526 (2.4)     | 3,691  | 1.0 | 0.35 (0.24-0.50) | <0.001* | 0.42 (0.29-0.60) | <0.001* |       |
| Normal weight (n = 66,256) |                    |        |     |                  |         |                  |         |       |
| Low PA                     | 794/21,127 (3.8)   | 50,029 | 1.6 | 1                |         | 1                |         |       |
| Moderate PA                | 418/22,246 (1.9)   | 52,724 | 0.8 | 0.50 (0.44-0.56) | <0.001* | 0.54 (0.48-0.60) | <0.001* |       |
| High PA                    | 278/22,883 (1.2)   | 54,288 | 0.5 | 0.32 (0.28-0.37) | <0.001* | 0.37 (0.32-0.42) | <0.001* |       |
| Overweight (n = 44,511)    |                    |        |     |                  |         |                  |         |       |
| Low PA                     | 462/13,857 (3.3)   | 33,368 | 1.4 | 1                |         | 1                |         |       |
| Moderate PA                | 215/15,003 (1.4)   | 36,789 | 0.6 | 0.42 (0.36-0.50) | <0.001* | 0.45 (0.38-0.53) | <0.001* |       |
| High PA                    | 173/15,651 (1.1)   | 38,638 | 0.4 | 0.33 (0.27-0.39) | <0.001* | 0.36 (0.30-0.43) | <0.001* |       |
| Obese (n = 59,112)         |                    |        |     |                  |         |                  |         |       |
| Low PA                     | 629/21,203 (3.0)   | 50,642 | 1.2 | 1                |         | 1                |         |       |

|                                     |                    |         |     |                  |         |                  |         |        |
|-------------------------------------|--------------------|---------|-----|------------------|---------|------------------|---------|--------|
| Moderate PA                         | 277/19,349 (1.4)   | 48,476  | 0.6 | 0.46 (0.40-0.54) | <0.001* | 0.49 (0.43-0.57) | <0.001* | 0.006* |
| High PA                             | 200/18,560 (1.1)   | 47,090  | 0.4 | 0.35 (0.30-0.41) | <0.001* | 0.36 (0.31-0.43) | <0.001* |        |
| Smoking status                      |                    |         |     |                  |         |                  |         |        |
| Non-smoker (n = 158,863)            |                    |         |     |                  |         |                  |         |        |
| Low PA                              | 1,628/52,333 (3.1) | 124,566 | 1.3 | 1                |         | 1                |         | 0.535  |
| Moderate PA                         | 751/52,950 (1.4)   | 128,194 | 0.6 | 0.45 (0.41-0.49) | <0.001* | 0.48 (0.44-0.53) | <0.001* |        |
| High PA                             | 552/53,580 (1.0)   | 130,766 | 0.4 | 0.33 (0.30-0.36) | <0.001* | 0.36 (0.32-0.39) | <0.001* |        |
| Past or current smoker (n = 16,997) |                    |         |     |                  |         |                  |         |        |
| Low PA                              | 420/6,287 (6.7)    | 15,253  | 2.8 | 1                |         | 1                |         | 0.535  |
| Moderate PA                         | 233/5,670 (4.1)    | 14,556  | 1.6 | 0.59 (0.50-0.69) | <0.001* | 0.60 (0.51-0.71) | <0.001* |        |
| High PA                             | 135/5,040 (2.7)    | 12,941  | 1.0 | 0.39 (0.32-0.47) | <0.001* | 0.41 (0.34-0.50) | <0.001* |        |
| Alcohol consumption                 |                    |         |     |                  |         |                  |         |        |
| < 1 time a week (n = 153,492)       |                    |         |     |                  |         |                  |         | 0.535  |
| Low PA                              | 1,777/51,745 (3.4) | 123,391 | 1.4 | 1                |         | 1                |         |        |
| Moderate PA                         | 832/51,022 (1.6)   | 124,034 | 0.7 | 0.47 (0.43-0.51) | <0.001* | 0.50 (0.46-0.55) | <0.001* |        |
| High PA                             | 595/50,725 (1.2)   | 124,362 | 0.5 | 0.34 (0.31-0.37) | <0.001* | 0.38 (0.34-0.41) | <0.001* |        |
| ≥ 1 time a week (n = 22,368)        |                    |         |     |                  |         |                  |         | 0.535  |
| Low PA                              | 271/6,875 (3.9)    | 16,428  | 1.6 | 1                |         | 1                |         |        |

|                                               |                    |         |     |                  |         |                  |         |
|-----------------------------------------------|--------------------|---------|-----|------------------|---------|------------------|---------|
| Moderate PA                                   | 152/7,598 (2.0)    | 18,716  | 0.8 | 0.50 (0.41-0.61) | <0.001* | 0.53 (0.43-0.65) | <0.001* |
| High PA                                       | 92/7,895 (1.2)     | 19,345  | 0.5 | 0.29 (0.23-0.37) | <0.001* | 0.32 (0.25-0.40) | <0.001* |
| Total cholesterol                             |                    |         |     |                  |         |                  |         |
| < 200 mg/dL (n = 95,839)                      |                    |         |     |                  |         |                  |         |
| Low PA                                        | 1,189/31,663 (3.8) | 73,242  | 1.6 | 1                |         | 1                |         |
| Moderate PA                                   | 593/31,943 (1.9)   | 75,278  | 0.8 | 0.49 (0.44-0.54) | <0.001* | 0.53 (0.48-0.59) | <0.001* |
| High PA                                       | 445/32,233 (1.4)   | 76,742  | 0.6 | 0.36 (0.32-0.40) | <0.001* | 0.41 (0.37-0.46) | <0.001* |
| ≥ 200 to 240 < mg/dL (n = 55,466)             |                    |         |     |                  |         |                  |         |
| Low PA                                        | 590/18,269 (3.2)   | 44,524  | 1.3 | 1                |         | 1                |         |
| Moderate PA                                   | 279/18,594 (1.5)   | 46,613  | 0.6 | 0.45 (0.39-0.52) | <0.001* | 0.47 (0.41-0.55) | <0.001* |
| High PA                                       | 178/18,603 (1.0)   | 46,866  | 0.4 | 0.29 (0.25-0.34) | <0.001* | 0.31 (0.26-0.37) | <0.001* |
| ≥ 240 mg/dL (n = 24,555)                      |                    |         |     |                  |         |                  |         |
| Low PA                                        | 269/8,688 (3.1)    | 22,053  | 1.2 | 1                |         | 1                |         |
| Moderate PA                                   | 112/8,083 (1.4)    | 20,859  | 0.5 | 0.44 (0.35-0.55) | <0.001* | 0.48 (0.39-0.60) | <0.001* |
| High PA                                       | 64/7,784 (0.8)     | 20,099  | 0.3 | 0.26 (0.20-0.35) | <0.001* | 0.30 (0.23-0.40) | <0.001* |
| Blood pressure                                |                    |         |     |                  |         |                  |         |
| SBP <140 mmHg and DBP < 90 mmHg (n = 139,842) |                    |         |     |                  |         |                  |         |
| Low PA                                        | 1,478/45,582 (3.2) | 106,876 | 1.4 | 1                |         | 1                |         |

0.151

0.392

|                                                        |                    |         |     |                  |         |                  |         |
|--------------------------------------------------------|--------------------|---------|-----|------------------|---------|------------------|---------|
| Moderate PA                                            | 732/46,931 (1.6)   | 111,944 | 0.7 | 0.47 (0.43-0.52) | <0.001* | 0.51 (0.46-0.55) | <0.001* |
| High PA                                                | 510/47,329 (1.1)   | 114,415 | 0.4 | 0.33 (0.29-0.36) | <0.001* | 0.36 (0.33-0.40) | <0.001* |
| SBP $\geq$ 140 mmHg or DBP $\geq$ 90 mmHg (n = 36,018) |                    |         |     |                  |         |                  |         |
| Low PA                                                 | 570/13,038 (4.4)   | 32,943  | 1.7 | 1                |         | 1                |         |
| Moderate PA                                            | 252/11,689 (2.2)   | 30,806  | 0.8 | 0.48 (0.41-0.55) | <0.001* | 0.51 (0.44-0.59) | <0.001* |
| High PA                                                | 177/11,291 (1.6)   | 29,292  | 0.6 | 0.35 (0.30-0.42) | <0.001* | 0.39 (0.32-0.46) | <0.001* |
| Fasting blood glucose                                  |                    |         |     |                  |         |                  | 0.004*  |
| < 100 mg/dL (n = 106,235)                              |                    |         |     |                  |         |                  |         |
| Low PA                                                 | 1,044/34,571 (3.0) | 83,734  | 1.2 | 1                |         | 1                |         |
| Moderate PA                                            | 514/35,946 (1.4)   | 89,273  | 0.6 | 0.46 (0.42-0.52) | <0.001* | 0.49 (0.44-0.54) | <0.001* |
| High PA                                                | 350/35,718 (1.0)   | 88,892  | 0.4 | 0.32 (0.28-0.36) | <0.001* | 0.35 (0.31-0.40) | <0.001* |
| $\geq$ 100 mg/dL (n = 69,625)                          |                    |         |     |                  |         |                  |         |
| Low PA                                                 | 1,004/24,049 (4.2) | 56,085  | 1.8 | 1                |         | 1                |         |
| Moderate PA                                            | 470/22,674 (2.1)   | 53,477  | 0.9 | 0.49 (0.44-0.55) | <0.001* | 0.53 (0.47-0.59) | <0.001* |
| High PA                                                | 337/22,902 (1.5)   | 54,815  | 0.6 | 0.35 (0.31-0.39) | <0.001* | 0.39 (0.34-0.44) | <0.001* |

Abbreviations: CCI, Charlson comorbidity index; DBP, diastolic blood pressure; fx, fracture; PA, physical activity; PY, person-year; SBP, systolic blood pressure

\* Cox proportional hazard model, Significance at  $P < 0.05$  with Bonferroni correction

<sup>a</sup> Stratified by age, gender, income, and region of residence in subgroup analyses according to income and region of residence

<sup>b</sup> In subgroup analyses according to income and region of residence, the model was adjusted for total cholesterol, SBP, DBP, fasting blood glucose, obesity, smoking, alcohol consumption, and CCI score; in other subgroup analyses, the model was adjusted for above variable plus age, gender, income, and region of residence.
